# Supplementary material for: Expression Pattern of Leptin and Its Receptors in Endometrioid Endometrial Cancer
Source: MDPI journal article supplement (doi:10.3390/jcm10132787), 2021-06-24
Supplement: s1 [file s1]

# Supplementary Material

**Table 1.** Exact p-value of the expression profile of LEP, LEPROT, LEPROTL1, LEPR in endometrial tissue samples and whole blood of patients determined by microarrays and RT-qPCR ( $p < 0.05$ ;  $FC > 3$  or  $< -3$ ).

| Material    | mRNA            | ID          | Microarray |          |          | RT-qPCR  |          |          |
|-------------|-----------------|-------------|------------|----------|----------|----------|----------|----------|
|             |                 |             | G1 vs. C   | G2 vs. C | G3 vs. C | G1 vs. C | G2 vs. C | G3 vs. C |
| Tissue      | <i>LEP</i>      | 207092_at   | 0.0325     | 0.02294  | 0.0001   | 0.0034   | 0.0018   | 0.0001   |
|             | <i>LEPROT</i>   | 202377_at   | 0.0194     | 0.0155   | 0.0421   | 0.03698  | 0.04125  | 0.03699  |
|             |                 | 202378_s_at | 0.0369     | 0.0725   | 0.0541   |          |          |          |
|             | <i>LEPROTL1</i> | 202594_at   | 0.0001     | 0.0036   | 0.0044   | 0.0025   | 0.0014   | 0.0024   |
|             |                 | 202595_s_at | 0.0025     | 0.0047   | 0.0047   |          |          |          |
|             | <i>LEPR</i>     | 209894_at   | 0.0084     | 0.0004   | 0.0001   | 0.0016   | 0.0002   | 0.0001   |
|             |                 | 209959_at   | 0.0054     | 0.0003   | 0.0001   |          |          |          |
|             |                 | 211167_s_at | 0.0067     | 0.0006   | 0.0001   |          |          |          |
|             |                 | 211354_s_at | 0.0064     | 0.0002   | 0.0001   |          |          |          |
|             |                 | 211355_x_at | 0.0072     | 0.0004   | 0.0001   |          |          |          |
|             |                 |             |            |          |          |          |          |          |
| Whole blood | <i>LEP</i>      | 207092_at   | 0.0064     | 0.0005   | 0.0001   | 0.0058   | 0.0001   | 0.0001   |
|             | <i>LEPROT</i>   | 202377_at   | 0.0047     | 0.0315   | 0.0364   | 0.0412   | 0.0369   | 0.0354   |
|             |                 | 202378_s_at | 0.0038     | 0.00954  | 0.0258   |          |          |          |
|             | <i>LEPROTL1</i> | 202594_at   | 0.0004     | 0.0009   | 0.0001   | 0.0027   | 0.0008   | 0.0001   |
|             |                 | 202595_s_at | 0.0039     | 0.0084   | 0.0001   |          |          |          |
|             | <i>LEPR</i>     | 209894_at   | 0.0001     | 0.0001   | 0.0001   | 0.0001   | 0.0001   | 0.0001   |
|             |                 | 209959_at   | 0.0001     | 0.0001   | 0.0001   |          |          |          |
|             |                 | 211167_s_at | 0.0001     | 0.0001   | 0.0001   |          |          |          |
|             |                 | 211354_s_at | 0.0001     | 0.0001   | 0.0001   |          |          |          |
|             |                 | 211355_x_at | 0.0001     | 0.0001   | 0.0001   |          |          |          |
|             |                 | 211356_x_at | 0.0001     | 0.0001   | 0.0001   |          |          |          |
|             |                 |             |            |          |          |          |          |          |

ID, number of the probe; FC, fold-change; C, control; G, endometrial cancer grade.  $p < 0.05$  vs. C group
